# Supplementary material for: Volume dependence of the dielectric properties of amorphous SiO2
Source: Royal Society of Chemistry journal article supplement (doi:10.1039/c5cp06775h), 2016-01-01
Supplement: c5cp06775h1.pdf [file c5cp06775h1.pdf]

**Supporting information**

**for**

**Volume dependence of the dielectric properties of amorphous SiO<sub>2</sub>**

Oleksandr I. Malyi<sup>1\*</sup>, Mathias Boström<sup>1</sup>, Vadym V. Kulish<sup>2</sup>, Priyadarshini Thiyam<sup>3</sup>, Drew F. Parsons<sup>4</sup>, and Clas Persson<sup>1,3,5</sup>

1 – Centre for Materials Science and Nanotechnology, University of Oslo, P. O. Box 1048 Blindern, NO-0316 Oslo, Norway

2 – Department of Mechanical Engineering, National University of Singapore, Block EA #07-08, 9 Engineering Drive 1, Singapore 117576, Singapore

3 – Department of Materials Science and Engineering, Royal Institute of Technology, SE-100 44 Stockholm, Sweden

4 – School of Engineering and Information Technology, Murdoch University, 90 South St, Murdoch, WA 6150, Australia

5 – Department of Physics, University of Oslo, P. O. Box 1048 Blindern, NO-0316 Oslo, Norway

**E-mail:** [oleksandr.malyi@smn.uio.no](mailto:oleksandr.malyi@smn.uio.no) (O.I.M\*)

**Table S1.** Monkhorst-Pack grids used in the first principles calculations. For non am-SiO<sub>2</sub> polymorphs, Materials Project id of each SiO<sub>2</sub> is given<sup>1</sup>

| System                       | Type of calculations                    | Size                   |
|------------------------------|-----------------------------------------|------------------------|
| All systems                  | BOMD                                    | single $\Gamma$ -point |
|                              | Density functional perturbation theory  | 2×2×2                  |
| am-SiO <sub>2</sub>          | Frequency dependent dielectric function | 4×4×4                  |
| $\alpha$ -SiO <sub>2</sub>   |                                         | 4×4×4                  |
| SiO <sub>2</sub> (mp-604717) |                                         | 5×5×5                  |
| SiO <sub>2</sub> (mp-560527) |                                         | 5×4×5                  |
| SiO <sub>2</sub> (mp-559273) |                                         | 2×3×3                  |
| SiO <sub>2</sub> (mp-555960) |                                         | 4×4×4                  |
| SiO <sub>2</sub> (mp-11684)  |                                         | 6×4×7                  |
| SiO <sub>2</sub> (mp-10948)  |                                         | 5×5×4                  |

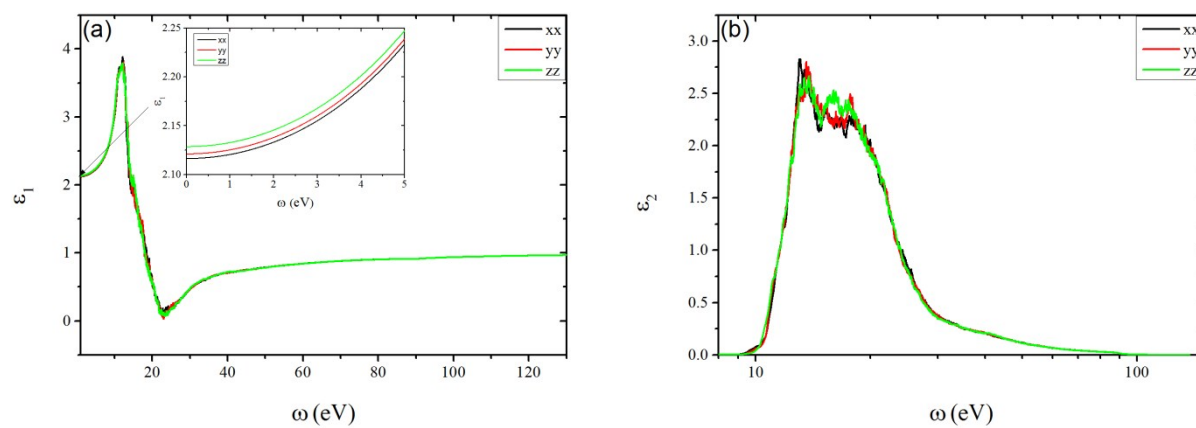

**Figure S1** (a) Real and (b) imaginary parts of frequency dependent dielectric tensor computed for most anisotropic am-SiO<sub>2</sub> sample ( $\Delta = 3.6$  eV). The ionic contribution to the dielectric function is not shown.

### Visualization

The visualization of computed structures was made by VESTA software.<sup>2</sup>

## Structures used in calculations of dielectric functions

### Amorphous SiO<sub>2</sub>

am-SiO<sub>2</sub>(generated by BOMD: 10ps at 5000 K, 25ps from 5000 to 2500 K, 20ps at 2500K, 25ps from 2500 to 1 K)

```
_symmetry_space_group_name_H-M 'P 1'  
_cell_length_a 9.89233570  
_cell_length_b 9.91146850  
_cell_length_c 11.69870672  
_cell_angle_alpha 93.82678881  
_cell_angle_beta 90.91341548  
_cell_angle_gamma 120.21924143  
_symmetry_Int_Tables_number 1  
_chemical_formula_structural SiO2  
_chemical_formula_sum 'Si24 O48'  
_cell_volume 987.3118521  
_cell_formula_units_Z 24  
loop_  
_symmetry_equiv_pos_site_id  
_symmetry_equiv_pos_as_xyz  
1 'x, y, z'  
loop_  
_atom_site_type_symbol  
_atom_site_label  
_atom_site_symmetry_multiplicity  
_atom_site_fract_x  
_atom_site_fract_y  
_atom_site_fract_z  
_atom_site_occupancy  
O O1 1 0.638835 0.866664 0.070688 1  
O O2 1 0.219950 0.249745 0.218036 1  
O O3 1 0.676003 0.326131 0.840594 1  
O O4 1 0.465112 0.382003 0.947857 1  
O O5 1 0.544184 0.022339 0.680074 1  
O O6 1 0.011499 0.071580 0.797727 1  
O O7 1 0.961537 0.441156 0.453784 1  
O O8 1 0.463497 0.555582 0.284047 1  
O O9 1 0.208499 0.370222 0.866071 1  
O O10 1 0.087959 0.683043 0.112990 1  
O O11 1 0.903500 0.258938 0.865136 1  
O O12 1 0.843098 0.642671 0.993081 1  
O O13 1 0.713553 0.885361 0.722135 1  
O O14 1 0.558502 0.198278 0.032058 1  
O O15 1 0.918370 0.011456 0.175922 1  
O O16 1 0.461046 0.484492 0.618420 1  
O O17 1 0.835627 0.325354 0.655851 1  
O O18 1 0.460671 0.228521 0.639634 1  
O O19 1 0.539088 0.923093 0.875722 1  
O O20 1 0.366833 0.858469 0.053593 1  
O O21 1 0.407628 0.714154 0.687041 1  
O O22 1 0.544984 0.219645 0.254742 1  
O O23 1 0.251326 0.716692 0.441762 1  
O O24 1 0.671060 0.207191 0.454678 1  
O O25 1 0.801653 0.434919 0.150664 1  
O O26 1 0.363942 0.010930 0.404169 1  
O O27 1 0.235058 0.481334 0.517121 1  
O O28 1 0.382288 0.100935 0.829770 1  
O O29 1 0.891897 0.733728 0.221292 1  
O O30 1 0.881208 0.760479 0.781955 1  
O O31 1 0.743932 0.144003 0.179573 1
```

|    |      |   |          |          |          |   |
|----|------|---|----------|----------|----------|---|
| O  | O32  | 1 | 0.523085 | 0.724790 | 0.484837 | 1 |
| O  | O33  | 1 | 0.986126 | 0.992248 | 0.381814 | 1 |
| O  | O34  | 1 | 0.175320 | 0.990803 | 0.112205 | 1 |
| O  | O35  | 1 | 0.744463 | 0.698479 | 0.399943 | 1 |
| O  | O36  | 1 | 0.197850 | 0.196192 | 0.547017 | 1 |
| O  | O37  | 1 | 0.440353 | 0.645667 | 0.928079 | 1 |
| O  | O38  | 1 | 0.464675 | 0.313838 | 0.435887 | 1 |
| O  | O39  | 1 | 0.128423 | 0.825907 | 0.919020 | 1 |
| O  | O40  | 1 | 0.302092 | 0.476751 | 0.088439 | 1 |
| O  | O41  | 1 | 0.912297 | 0.165996 | 0.513102 | 1 |
| O  | O42  | 1 | 0.944124 | 0.933913 | 0.595132 | 1 |
| O  | O43  | 1 | 0.961631 | 0.546115 | 0.820981 | 1 |
| O  | O44  | 1 | 0.253428 | 0.923955 | 0.612344 | 1 |
| O  | O45  | 1 | 0.061901 | 0.164794 | 0.012334 | 1 |
| O  | O46  | 1 | 0.654982 | 0.875058 | 0.294329 | 1 |
| O  | O47  | 1 | 0.163120 | 0.472156 | 0.290826 | 1 |
| O  | O48  | 1 | 0.051038 | 0.787052 | 0.426374 | 1 |
| Si | Si49 | 1 | 0.842961 | 0.358771 | 0.794076 | 1 |
| Si | Si50 | 1 | 0.740241 | 0.976963 | 0.184006 | 1 |
| Si | Si51 | 1 | 0.948590 | 0.693095 | 0.877237 | 1 |
| Si | Si52 | 1 | 0.012895 | 0.077822 | 0.511310 | 1 |
| Si | Si53 | 1 | 0.887345 | 0.909297 | 0.725276 | 1 |
| Si | Si54 | 1 | 0.518978 | 0.252777 | 0.912974 | 1 |
| Si | Si55 | 1 | 0.843725 | 0.285002 | 0.520219 | 1 |
| Si | Si56 | 1 | 0.357769 | 0.465369 | 0.959044 | 1 |
| Si | Si57 | 1 | 0.094298 | 0.101345 | 0.129297 | 1 |
| Si | Si58 | 1 | 0.899409 | 0.617071 | 0.120407 | 1 |
| Si | Si59 | 1 | 0.233111 | 0.867837 | 0.473433 | 1 |
| Si | Si60 | 1 | 0.593719 | 0.713939 | 0.361916 | 1 |
| Si | Si61 | 1 | 0.196039 | 0.846765 | 0.051531 | 1 |
| Si | Si62 | 1 | 0.664342 | 0.250037 | 0.153039 | 1 |
| Si | Si63 | 1 | 0.404262 | 0.064044 | 0.693330 | 1 |
| Si | Si64 | 1 | 0.408965 | 0.606395 | 0.576582 | 1 |
| Si | Si65 | 1 | 0.041730 | 0.216221 | 0.886914 | 1 |
| Si | Si66 | 1 | 0.145113 | 0.526510 | 0.422188 | 1 |
| Si | Si67 | 1 | 0.489240 | 0.819869 | 0.985307 | 1 |
| Si | Si68 | 1 | 0.552342 | 0.883320 | 0.741232 | 1 |
| Si | Si69 | 1 | 0.513988 | 0.186590 | 0.388459 | 1 |
| Si | Si70 | 1 | 0.288823 | 0.439303 | 0.222164 | 1 |
| Si | Si71 | 1 | 0.919697 | 0.803376 | 0.355481 | 1 |
| Si | Si72 | 1 | 0.388421 | 0.306290 | 0.559640 | 1 |

am-SiO<sub>2</sub> (generated by BOMD: 10ps at 5000 K, 25ps from 5000 to 2500 K, 20ps at 2500K, 25ps from 2500 to 1 K)

```
_symmetry_space_group_name_H-M 'P 1'  
_cell_length_a 10.08151023  
_cell_length_b 10.30435685  
_cell_length_c 11.43355809  
_cell_angle_alpha 92.46301949  
_cell_angle_beta 88.69620863  
_cell_angle_gamma 123.06630754  
_symmetry_Int_Tables_number 1  
_chemical_formula_structural SiO2  
_chemical_formula_sum 'Si24 O48'  
_cell_volume 994.468274361  
_cell_formula_units_Z 24  
loop_  
_symmetry_equiv_pos_site_id  
_symmetry_equiv_pos_as_xyz  
1 'x, y, z'  
loop_  
_atom_site_type_symbol  
_atom_site_label  
_atom_site_symmetry_multiplicity  
_atom_site_fract_x  
_atom_site_fract_y  
_atom_site_fract_z  
_atom_site_occupancy  
O O1 1 0.680338 0.117293 0.988751 1  
O O2 1 0.874246 0.314041 0.411466 1  
O O3 1 0.057242 0.050406 0.128768 1  
O O4 1 0.012120 0.605396 0.798095 1  
O O5 1 0.771299 0.011075 0.165022 1  
O O6 1 0.164402 0.518598 0.476373 1  
O O7 1 0.239680 0.323116 0.933991 1  
O O8 1 0.097488 0.815398 0.968440 1  
O O9 1 0.073056 0.775576 0.200268 1  
O O10 1 0.572574 0.295654 0.018106 1  
O O11 1 0.423267 0.802906 0.965538 1  
O O12 1 0.976867 0.267753 0.053450 1  
O O13 1 0.444983 0.783969 0.472938 1  
O O14 1 0.406814 0.351236 0.743102 1  
O O15 1 0.756978 0.336497 0.832198 1  
O O16 1 0.564951 0.516541 0.937334 1  
O O17 1 0.669117 0.660968 0.434324 1  
O O18 1 0.597459 0.426707 0.565567 1  
O O19 1 0.431125 0.011869 0.591056 1  
O O20 1 0.669828 0.844233 0.835009 1  
O O21 1 0.368787 0.852462 0.180205 1  
O O22 1 0.959370 0.071967 0.884336 1  
O O23 1 0.580005 0.075811 0.388552 1  
O O24 1 0.269829 0.881184 0.390349 1  
O O25 1 0.901954 0.796485 0.810634 1  
O O26 1 0.387683 0.606750 0.118633 1  
O O27 1 0.275212 0.206113 0.544653 1  
O O28 1 0.423745 0.829536 0.739529 1  
O O29 1 0.390017 0.540289 0.335424 1  
O O30 1 0.394426 0.513775 0.565800 1  
O O31 1 0.895916 0.651743 0.433988 1  
O O32 1 0.808366 0.826384 0.026677 1  
O O33 1 0.851713 0.839510 0.271168 1  
O O34 1 0.475191 0.094905 0.828670 1
```

|    |      |   |          |          |          |   |
|----|------|---|----------|----------|----------|---|
| O  | O35  | 1 | 0.749498 | 0.248409 | 0.203231 | 1 |
| O  | O36  | 1 | 0.133645 | 0.608327 | 0.060841 | 1 |
| O  | O37  | 1 | 0.304395 | 0.072911 | 0.228837 | 1 |
| O  | O38  | 1 | 0.975200 | 0.943323 | 0.486846 | 1 |
| O  | O39  | 1 | 0.924705 | 0.391741 | 0.633769 | 1 |
| O  | O40  | 1 | 0.838319 | 0.565111 | 0.052010 | 1 |
| O  | O41  | 1 | 0.134594 | 0.169701 | 0.344021 | 1 |
| O  | O42  | 1 | 0.196380 | 0.895958 | 0.745062 | 1 |
| O  | O43  | 1 | 0.020725 | 0.219585 | 0.539257 | 1 |
| O  | O44  | 1 | 0.595312 | 0.533601 | 0.167845 | 1 |
| O  | O45  | 1 | 0.306034 | 0.323172 | 0.168021 | 1 |
| O  | O46  | 1 | 0.387506 | 0.581072 | 0.819709 | 1 |
| O  | O47  | 1 | 0.655427 | 0.372221 | 0.358776 | 1 |
| O  | O48  | 1 | 0.028725 | 0.354256 | 0.831175 | 1 |
| Si | Si49 | 1 | 0.710522 | 0.248933 | 0.342322 | 1 |
| Si | Si50 | 1 | 0.701317 | 0.517956 | 0.450318 | 1 |
| Si | Si51 | 1 | 0.869674 | 0.927423 | 0.151152 | 1 |
| Si | Si52 | 1 | 0.416568 | 0.374825 | 0.603027 | 1 |
| Si | Si53 | 1 | 0.859377 | 0.788962 | 0.403638 | 1 |
| Si | Si54 | 1 | 0.050717 | 0.254200 | 0.926866 | 1 |
| Si | Si55 | 1 | 0.027908 | 0.686400 | 0.070390 | 1 |
| Si | Si56 | 1 | 0.480204 | 0.766085 | 0.841446 | 1 |
| Si | Si57 | 1 | 0.999519 | 0.363071 | 0.515943 | 1 |
| Si | Si58 | 1 | 0.327033 | 0.715101 | 0.081650 | 1 |
| Si | Si59 | 1 | 0.421526 | 0.505159 | 0.202234 | 1 |
| Si | Si60 | 1 | 0.835510 | 0.885221 | 0.890294 | 1 |
| Si | Si61 | 1 | 0.203418 | 0.153302 | 0.218520 | 1 |
| Si | Si62 | 1 | 0.931873 | 0.421061 | 0.774681 | 1 |
| Si | Si63 | 1 | 0.433297 | 0.936615 | 0.462528 | 1 |
| Si | Si64 | 1 | 0.355104 | 0.594176 | 0.462931 | 1 |
| Si | Si65 | 1 | 0.794663 | 0.162606 | 0.103231 | 1 |
| Si | Si66 | 1 | 0.051232 | 0.777834 | 0.828654 | 1 |
| Si | Si67 | 1 | 0.383016 | 0.960783 | 0.726542 | 1 |
| Si | Si68 | 1 | 0.644926 | 0.480603 | 0.045289 | 1 |
| Si | Si69 | 1 | 0.400755 | 0.440622 | 0.861780 | 1 |
| Si | Si70 | 1 | 0.619596 | 0.209735 | 0.917067 | 1 |
| Si | Si71 | 1 | 0.102325 | 0.132524 | 0.481691 | 1 |
| Si | Si72 | 1 | 0.254195 | 0.895735 | 0.250590 | 1 |

am-SiO<sub>2</sub> (generated by BOMD: 10ps at 5000 K, 10ps from 5000 to 2500 K, 20ps at 2500K, 30ps from 2500 to 1 K)

```
_symmetry_space_group_name_H-M 'P 1'  
_cell_length_a 10.18822679  
_cell_length_b 10.41053793  
_cell_length_c 10.96303544  
_cell_angle_alpha 89.84595051  
_cell_angle_beta 88.57612039  
_cell_angle_gamma 120.33160296  
_symmetry_Int_Tables_number 1  
_chemical_formula_structural SiO2  
_chemical_formula_sum 'Si24 O48'  
_cell_volume 1003.16063123  
_cell_formula_units_Z 24  
loop_  
_symmetry_equiv_pos_site_id  
_symmetry_equiv_pos_as_xyz  
1 'x, y, z'  
loop_  
_atom_site_type_symbol  
_atom_site_label  
_atom_site_symmetry_multiplicity  
_atom_site_fract_x  
_atom_site_fract_y  
_atom_site_fract_z  
_atom_site_occupancy  
O O1 1 0.560555 0.125821 0.127904 1  
O O2 1 0.758992 0.055671 0.026370 1  
O O3 1 0.586904 0.707082 0.326756 1  
O O4 1 0.988459 0.825203 0.192506 1  
O O5 1 0.430560 0.547203 0.074293 1  
O O6 1 0.324505 0.440976 0.294332 1  
O O7 1 0.928388 0.867645 0.700158 1  
O O8 1 0.174126 0.120673 0.722565 1  
O O9 1 0.063572 0.925780 0.484318 1  
O O10 1 0.730400 0.389163 0.539137 1  
O O11 1 0.257199 0.853354 0.571674 1  
O O12 1 0.143534 0.478109 0.138381 1  
O O13 1 0.337724 0.420583 0.715006 1  
O O14 1 0.564074 0.575766 0.546968 1  
O O15 1 0.958891 0.017252 0.899488 1  
O O16 1 0.291865 0.527875 0.513627 1  
O O17 1 0.378759 0.115817 0.931920 1  
O O18 1 0.715609 0.600308 0.108905 1  
O O19 1 0.168590 0.797043 0.337355 1  
O O20 1 0.988964 0.637956 0.535989 1  
O O21 1 0.299032 0.065050 0.244668 1  
O O22 1 0.237392 0.866776 0.079090 1  
O O23 1 0.934367 0.093861 0.575862 1  
O O24 1 0.468140 0.327108 0.144786 1  
O O25 1 0.531618 0.977049 0.666199 1  
O O26 1 0.375705 0.717789 0.224373 1  
O O27 1 0.976433 0.371995 0.578328 1  
O O28 1 0.776663 0.835401 0.494940 1  
O O29 1 0.478060 0.860575 0.439800 1  
O O30 1 0.673738 0.915941 0.826777 1  
O O31 1 0.483331 0.114904 0.499803 1  
O O32 1 0.442974 0.701061 0.710065 1  
O O33 1 0.927027 0.545771 0.194002 1  
O O34 1 0.894284 0.479542 0.749599 1
```



|    |      |   |          |          |          |   |
|----|------|---|----------|----------|----------|---|
| O  | O35  | 1 | 0.542471 | 0.422661 | 0.923238 | 1 |
| O  | O36  | 1 | 0.129099 | 0.886859 | 0.865062 | 1 |
| O  | O37  | 1 | 0.665079 | 0.258672 | 0.869941 | 1 |
| O  | O38  | 1 | 0.776850 | 0.621969 | 0.351634 | 1 |
| O  | O39  | 1 | 0.383592 | 0.861435 | 0.877145 | 1 |
| O  | O40  | 1 | 0.655389 | 0.972662 | 0.246363 | 1 |
| O  | O41  | 1 | 0.932035 | 0.432211 | 0.979230 | 1 |
| O  | O42  | 1 | 0.599220 | 0.281936 | 0.320692 | 1 |
| O  | O43  | 1 | 0.765373 | 0.178351 | 0.439877 | 1 |
| O  | O44  | 1 | 0.069087 | 0.279330 | 0.397510 | 1 |
| O  | O45  | 1 | 0.301854 | 0.277985 | 0.511710 | 1 |
| O  | O46  | 1 | 0.467325 | 0.262900 | 0.716743 | 1 |
| O  | O47  | 1 | 0.856536 | 0.265160 | 0.185196 | 1 |
| O  | O48  | 1 | 0.888020 | 0.217545 | 0.823835 | 1 |
| Si | Si49 | 1 | 0.676407 | 0.676824 | 0.431834 | 1 |
| Si | Si50 | 1 | 0.414655 | 0.565228 | 0.622681 | 1 |
| Si | Si51 | 1 | 0.505545 | 0.861057 | 0.776086 | 1 |
| Si | Si52 | 1 | 0.849367 | 0.349961 | 0.854574 | 1 |
| Si | Si53 | 1 | 0.522396 | 0.819054 | 0.308636 | 1 |
| Si | Si54 | 1 | 0.931219 | 0.935717 | 0.564648 | 1 |
| Si | Si55 | 1 | 0.438526 | 0.948768 | 0.542417 | 1 |
| Si | Si56 | 1 | 0.848854 | 0.648801 | 0.210138 | 1 |
| Si | Si57 | 1 | 0.051488 | 0.972770 | 0.801074 | 1 |
| Si | Si58 | 1 | 0.285722 | 0.932760 | 0.938623 | 1 |
| Si | Si59 | 1 | 0.476863 | 0.195092 | 0.212489 | 1 |
| Si | Si60 | 1 | 0.649305 | 0.246010 | 0.450322 | 1 |
| Si | Si61 | 1 | 0.543743 | 0.478763 | 0.063164 | 1 |
| Si | Si62 | 1 | 0.899174 | 0.474331 | 0.600469 | 1 |
| Si | Si63 | 1 | 0.116178 | 0.800443 | 0.480065 | 1 |
| Si | Si64 | 1 | 0.511205 | 0.266617 | 0.860422 | 1 |
| Si | Si65 | 1 | 0.709036 | 0.107233 | 0.147724 | 1 |
| Si | Si66 | 1 | 0.248902 | 0.379964 | 0.429844 | 1 |
| Si | Si67 | 1 | 0.173309 | 0.889862 | 0.212149 | 1 |
| Si | Si68 | 1 | 0.966346 | 0.430794 | 0.124001 | 1 |
| Si | Si69 | 1 | 0.320099 | 0.266098 | 0.662038 | 1 |
| Si | Si70 | 1 | 0.929866 | 0.225004 | 0.497740 | 1 |
| Si | Si71 | 1 | 0.820826 | 0.053203 | 0.890680 | 1 |
| Si | Si72 | 1 | 0.316713 | 0.544800 | 0.183927 | 1 |

am-SiO<sub>2</sub> (generated by BOMD: 10ps at 5000 K, 5ps from 5000 to 2500 K, 10ps at 2500K, 30ps from 2500 to 1 K)

```
_symmetry_space_group_name_H-M 'P 1'  
_cell_length_a 10.37472437  
_cell_length_b 10.20667480  
_cell_length_c 11.58818717  
_cell_angle_alpha 93.24624933  
_cell_angle_beta 86.71185027  
_cell_angle_gamma 123.63450900  
_symmetry_Int_Tables_number 1  
_chemical_formula_structural SiO2  
_chemical_formula_sum 'Si24 O48'  
_cell_volume 1019.52183266  
_cell_formula_units_Z 24  
loop_  
_symmetry_equiv_pos_site_id  
_symmetry_equiv_pos_as_xyz  
1 'x, y, z'  
loop_  
_atom_site_type_symbol  
_atom_site_label  
_atom_site_symmetry_multiplicity  
_atom_site_fract_x  
_atom_site_fract_y  
_atom_site_fract_z  
_atom_site_occupancy  
O O1 1 0.711050 0.974048 0.432629 1  
O O2 1 0.195690 0.229223 0.902258 1  
O O3 1 0.959160 0.937556 0.952467 1  
O O4 1 0.105108 0.393897 0.547392 1  
O O5 1 0.440440 0.354823 0.030491 1  
O O6 1 0.440065 0.654369 0.777607 1  
O O7 1 0.609090 0.681173 0.395224 1  
O O8 1 0.647050 0.957413 0.793764 1  
O O9 1 0.839735 0.698669 0.100958 1  
O O10 1 0.244834 0.837926 0.252689 1  
O O11 1 0.149490 0.161041 0.524226 1  
O O12 1 0.242259 0.953777 0.522135 1  
O O13 1 0.535423 0.076730 0.477386 1  
O O14 1 0.729295 0.552831 0.903759 1  
O O15 1 0.506732 0.782783 0.581148 1  
O O16 1 0.095668 0.586920 0.404418 1  
O O17 1 0.690524 0.101977 0.260496 1  
O O18 1 0.111307 0.952211 0.125371 1  
O O19 1 0.445741 0.207103 0.640469 1  
O O20 1 0.931314 0.272326 0.124700 1  
O O21 1 0.928715 0.724289 0.727338 1  
O O22 1 0.953916 0.863184 0.529194 1  
O O23 1 0.565557 0.416380 0.471935 1  
O O24 1 0.643303 0.495091 0.692357 1  
O O25 1 0.851224 0.971737 0.157465 1  
O O26 1 0.390548 0.941543 0.695250 1  
O O27 1 0.733354 0.799296 0.680404 1  
O O28 1 0.197928 0.310841 0.130378 1  
O O29 1 0.947107 0.528908 0.977322 1  
O O30 1 0.521090 0.089266 0.898434 1  
O O31 1 0.828981 0.294457 0.453571 1  
O O32 1 0.194613 0.561900 0.199214 1  
O O33 1 0.325240 0.530530 0.973487 1  
O O34 1 0.227522 0.986483 0.862879 1
```

|    |      |   |          |          |          |   |
|----|------|---|----------|----------|----------|---|
| O  | O35  | 1 | 0.675397 | 0.019658 | 0.032788 | 1 |
| O  | O36  | 1 | 0.841740 | 0.236581 | 0.884402 | 1 |
| O  | O37  | 1 | 0.147997 | 0.012124 | 0.338958 | 1 |
| O  | O38  | 1 | 0.364787 | 0.413149 | 0.627557 | 1 |
| O  | O39  | 1 | 0.405932 | 0.758065 | 0.366764 | 1 |
| O  | O40  | 1 | 0.309289 | 0.781318 | 0.893586 | 1 |
| O  | O41  | 1 | 0.034459 | 0.019529 | 0.737480 | 1 |
| O  | O42  | 1 | 0.683802 | 0.381863 | 0.095377 | 1 |
| O  | O43  | 1 | 0.530050 | 0.439946 | 0.249030 | 1 |
| O  | O44  | 1 | 0.046919 | 0.309626 | 0.326785 | 1 |
| O  | O45  | 1 | 0.860053 | 0.444241 | 0.756935 | 1 |
| O  | O46  | 1 | 0.123659 | 0.484859 | 0.824771 | 1 |
| O  | O47  | 1 | 0.400330 | 0.139096 | 0.185915 | 1 |
| O  | O48  | 1 | 0.329541 | 0.425344 | 0.407364 | 1 |
| Si | Si49 | 1 | 0.359604 | 0.949096 | 0.836728 | 1 |
| Si | Si50 | 1 | 0.507039 | 0.320845 | 0.141325 | 1 |
| Si | Si51 | 1 | 0.018031 | 0.401322 | 0.436012 | 1 |
| Si | Si52 | 1 | 0.505302 | 0.383937 | 0.608036 | 1 |
| Si | Si53 | 1 | 0.911724 | 0.854623 | 0.667910 | 1 |
| Si | Si54 | 1 | 0.233586 | 0.348651 | 0.529021 | 1 |
| Si | Si55 | 1 | 0.936275 | 0.890974 | 0.088246 | 1 |
| Si | Si56 | 1 | 0.786295 | 0.088279 | 0.145462 | 1 |
| Si | Si57 | 1 | 0.238803 | 0.690739 | 0.307582 | 1 |
| Si | Si58 | 1 | 0.511433 | 0.490722 | 0.378797 | 1 |
| Si | Si59 | 1 | 0.124282 | 0.997000 | 0.477226 | 1 |
| Si | Si60 | 1 | 0.580836 | 0.802247 | 0.707588 | 1 |
| Si | Si61 | 1 | 0.230004 | 0.984625 | 0.225136 | 1 |
| Si | Si62 | 1 | 0.408623 | 0.042155 | 0.582691 | 1 |
| Si | Si63 | 1 | 0.107670 | 0.043109 | 0.864303 | 1 |
| Si | Si64 | 1 | 0.693862 | 0.118277 | 0.403596 | 1 |
| Si | Si65 | 1 | 0.946087 | 0.423896 | 0.862234 | 1 |
| Si | Si66 | 1 | 0.290739 | 0.359150 | 0.005010 | 1 |
| Si | Si67 | 1 | 0.788752 | 0.552037 | 0.770579 | 1 |
| Si | Si68 | 1 | 0.801010 | 0.542581 | 0.022689 | 1 |
| Si | Si69 | 1 | 0.093983 | 0.368601 | 0.194162 | 1 |
| Si | Si70 | 1 | 0.299126 | 0.614917 | 0.868361 | 1 |
| Si | Si71 | 1 | 0.553886 | 0.796282 | 0.443167 | 1 |
| Si | Si72 | 1 | 0.672168 | 0.076081 | 0.903444 | 1 |

am-SiO<sub>2</sub> (generated by BOMD: 10ps at 5000 K, 25ps from 5000 to 2500 K, 20ps at 2500K, 25ps from 2500 to 1 K)

```
_symmetry_space_group_name_H-M 'P 1'  
_cell_length_a 10.10201206  
_cell_length_b 9.91718315  
_cell_length_c 12.14878968  
_cell_angle_alpha 86.44012684  
_cell_angle_beta 91.56996482  
_cell_angle_gamma 121.46101606  
_symmetry_Int_Tables_number 1  
_chemical_formula_structural SiO2  
_chemical_formula_sum 'Si24 O48'  
_cell_volume 1036.16672418  
_cell_formula_units_Z 24  
loop_  
_symmetry_equiv_pos_site_id  
_symmetry_equiv_pos_as_xyz  
1 'x, y, z'  
loop_  
_atom_site_type_symbol  
_atom_site_label  
_atom_site_symmetry_multiplicity  
_atom_site_fract_x  
_atom_site_fract_y  
_atom_site_fract_z  
_atom_site_occupancy  
O O1 1 0.483003 0.650035 0.176743 1  
O O2 1 0.892410 0.969880 0.683315 1  
O O3 1 0.825616 0.155272 0.544636 1  
O O4 1 0.448883 0.273904 0.763945 1  
O O5 1 0.015886 0.439962 0.926165 1  
O O6 1 0.781413 0.796036 0.203119 1  
O O7 1 0.153715 0.508916 0.668636 1  
O O8 1 0.680264 0.504493 0.617970 1  
O O9 1 0.147502 0.250428 0.673448 1  
O O10 1 0.450229 0.209033 0.354693 1  
O O11 1 0.250316 0.428691 0.853233 1  
O O12 1 0.427202 0.508731 0.676395 1  
O O13 1 0.492062 0.976155 0.448829 1  
O O14 1 0.378369 0.926370 0.051000 1  
O O15 1 0.049120 0.046873 0.506338 1  
O O16 1 0.036803 0.964136 0.303078 1  
O O17 1 0.214162 0.939878 0.449950 1  
O O18 1 0.837385 0.426077 0.496660 1  
O O19 1 0.225315 0.465239 0.069033 1  
O O20 1 0.138492 0.648398 0.466810 1  
O O21 1 0.390681 0.657484 0.463349 1  
O O22 1 0.033740 0.993265 0.082833 1  
O O23 1 0.816730 0.253486 0.335825 1  
O O24 1 0.916494 0.801574 0.912823 1  
O O25 1 0.221700 0.548177 0.277425 1  
O O26 1 0.732132 0.088067 0.749143 1  
O O27 1 0.650709 0.633624 0.024481 1  
O O28 1 0.329897 0.804887 0.622926 1  
O O29 1 0.895731 0.731989 0.467773 1  
O O30 1 0.995355 0.648951 0.642671 1  
O O31 1 0.615726 0.481444 0.224579 1  
O O32 1 0.734265 0.205411 0.939424 1  
O O33 1 0.187950 0.014229 0.690854 1  
O O34 1 0.283504 0.697724 0.914030 1
```

|    |      |   |          |          |          |   |
|----|------|---|----------|----------|----------|---|
| O  | O35  | 1 | 0.079275 | 0.373599 | 0.450201 | 1 |
| O  | O36  | 1 | 0.179081 | 0.086306 | 0.891632 | 1 |
| O  | O37  | 1 | 0.873367 | 0.346874 | 0.124565 | 1 |
| O  | O38  | 1 | 0.893877 | 0.057156 | 0.919284 | 1 |
| O  | O39  | 1 | 0.614507 | 0.861568 | 0.596178 | 1 |
| O  | O40  | 1 | 0.577407 | 0.905049 | 0.921000 | 1 |
| O  | O41  | 1 | 0.449660 | 0.199600 | 0.138350 | 1 |
| O  | O42  | 1 | 0.312328 | 0.341118 | 0.233259 | 1 |
| O  | O43  | 1 | 0.903342 | 0.108512 | 0.203364 | 1 |
| O  | O44  | 1 | 0.339281 | 0.934042 | 0.262145 | 1 |
| O  | O45  | 1 | 0.657597 | 0.572986 | 0.817550 | 1 |
| O  | O46  | 1 | 0.374997 | 0.990022 | 0.839011 | 1 |
| O  | O47  | 1 | 0.799160 | 0.496742 | 0.972465 | 1 |
| O  | O48  | 1 | 0.624503 | 0.069826 | 0.182235 | 1 |
| Si | Si49 | 1 | 0.555253 | 0.462131 | 0.718258 | 1 |
| Si | Si50 | 1 | 0.804578 | 0.194180 | 0.212882 | 1 |
| Si | Si51 | 1 | 0.300330 | 0.094870 | 0.798064 | 1 |
| Si | Si52 | 1 | 0.405522 | 0.882384 | 0.930431 | 1 |
| Si | Si53 | 1 | 0.890864 | 0.305645 | 0.457507 | 1 |
| Si | Si54 | 1 | 0.847509 | 0.576460 | 0.554471 | 1 |
| Si | Si55 | 1 | 0.198697 | 0.509460 | 0.942540 | 1 |
| Si | Si56 | 1 | 0.373932 | 0.016609 | 0.380705 | 1 |
| Si | Si57 | 1 | 0.153227 | 0.657417 | 0.604265 | 1 |
| Si | Si58 | 1 | 0.212978 | 0.555905 | 0.410622 | 1 |
| Si | Si59 | 1 | 0.765823 | 0.018837 | 0.642514 | 1 |
| Si | Si60 | 1 | 0.306434 | 0.498844 | 0.189255 | 1 |
| Si | Si61 | 1 | 0.450165 | 0.033425 | 0.155520 | 1 |
| Si | Si62 | 1 | 0.455798 | 0.307100 | 0.238625 | 1 |
| Si | Si63 | 1 | 0.939235 | 0.967965 | 0.196452 | 1 |
| Si | Si64 | 1 | 0.072269 | 0.070402 | 0.638113 | 1 |
| Si | Si65 | 1 | 0.855698 | 0.373295 | 0.992419 | 1 |
| Si | Si66 | 1 | 0.457523 | 0.823392 | 0.531163 | 1 |
| Si | Si67 | 1 | 0.636286 | 0.640230 | 0.156558 | 1 |
| Si | Si68 | 1 | 0.041574 | 0.912161 | 0.431444 | 1 |
| Si | Si69 | 1 | 0.740664 | 0.064345 | 0.882359 | 1 |
| Si | Si70 | 1 | 0.006191 | 0.985192 | 0.949273 | 1 |
| Si | Si71 | 1 | 0.757744 | 0.627509 | 0.929676 | 1 |
| Si | Si72 | 1 | 0.246697 | 0.426253 | 0.718326 | 1 |

am-SiO<sub>2</sub> (generated by BOMD: 10ps at 5000 K, 25ps from 5000 to 2500 K, 20ps at 2500K, 25ps from 2500 to 1 K)

```
_symmetry_space_group_name_H-M 'P 1'  
_cell_length_a 10.08171020  
_cell_length_b 10.19344055  
_cell_length_c 11.85021653  
_cell_angle_alpha 87.87798719  
_cell_angle_beta 89.96162115  
_cell_angle_gamma 121.30465328  
_symmetry_Int_Tables_number 1  
_chemical_formula_structural SiO2  
_chemical_formula_sum 'Si24 O48'  
_cell_volume 1039.52507081  
_cell_formula_units_Z 24  
loop_  
_symmetry_equiv_pos_site_id  
_symmetry_equiv_pos_as_xyz  
1 'x, y, z'  
loop_  
_atom_site_type_symbol  
_atom_site_label  
_atom_site_symmetry_multiplicity  
_atom_site_fract_x  
_atom_site_fract_y  
_atom_site_fract_z  
_atom_site_occupancy  
O O1 1 0.380782 0.754167 0.558927 1  
O O2 1 0.539217 0.480724 0.435512 1  
O O3 1 0.236095 0.006976 0.260721 1  
O O4 1 0.852671 0.749373 0.167139 1  
O O5 1 0.387876 0.328619 0.853203 1  
O O6 1 0.666022 0.858166 0.447081 1  
O O7 1 0.344921 0.707353 0.109998 1  
O O8 1 0.616918 0.798475 0.183542 1  
O O9 1 0.827532 0.349090 0.208530 1  
O O10 1 0.329541 0.192298 0.063085 1  
O O11 1 0.617803 0.043513 0.574724 1  
O O12 1 0.701720 0.250658 0.982293 1  
O O13 1 0.945254 0.807013 0.952637 1  
O O14 1 0.877687 0.983408 0.280314 1  
O O15 1 0.506941 0.158369 0.219106 1  
O O16 1 0.932531 0.564827 0.368908 1  
O O17 1 0.829391 0.526299 0.043836 1  
O O18 1 0.112569 0.574284 0.686401 1  
O O19 1 0.001061 0.344963 0.379181 1  
O O20 1 0.817889 0.938260 0.837697 1  
O O21 1 0.366300 0.322441 0.261332 1  
O O22 1 0.791596 0.555151 0.558843 1  
O O23 1 0.246849 0.389029 0.009113 1  
O O24 1 0.519209 0.855427 0.838074 1  
O O25 1 0.102268 0.364270 0.824103 1  
O O26 1 0.983649 0.366176 0.034684 1  
O O27 1 0.535384 0.124758 0.804214 1  
O O28 1 0.414795 0.858768 0.291201 1  
O O29 1 0.107263 0.742846 0.097673 1  
O O30 1 0.238437 0.340246 0.455242 1  
O O31 1 0.190804 0.616659 0.929694 1  
O O32 1 0.715347 0.267115 0.413844 1  
O O33 1 0.647331 0.816114 0.660744 1  
O O34 1 0.108502 0.108620 0.912562 1
```

|    |      |   |          |          |          |   |
|----|------|---|----------|----------|----------|---|
| O  | O35  | 1 | 0.418205 | 0.045803 | 0.435826 | 1 |
| O  | O36  | 1 | 0.837504 | 0.316999 | 0.764171 | 1 |
| O  | O37  | 1 | 0.383146 | 0.581507 | 0.306506 | 1 |
| O  | O38  | 1 | 0.548253 | 0.269221 | 0.578794 | 1 |
| O  | O39  | 1 | 0.109336 | 0.753426 | 0.532409 | 1 |
| O  | O40  | 1 | 0.679139 | 0.433389 | 0.823353 | 1 |
| O  | O41  | 1 | 0.868170 | 0.987733 | 0.056393 | 1 |
| O  | O42  | 1 | 0.961153 | 0.082885 | 0.482600 | 1 |
| O  | O43  | 1 | 0.298243 | 0.872511 | 0.719210 | 1 |
| O  | O44  | 1 | 0.524954 | 0.487355 | 0.661564 | 1 |
| O  | O45  | 1 | 0.906069 | 0.805990 | 0.432765 | 1 |
| O  | O46  | 1 | 0.021335 | 0.307618 | 0.605514 | 1 |
| O  | O47  | 1 | 0.332877 | 0.909566 | 0.947970 | 1 |
| O  | O48  | 1 | 0.590977 | 0.638572 | 0.847837 | 1 |
| Si | Si49 | 1 | 0.937857 | 0.670893 | 0.473151 | 1 |
| Si | Si50 | 1 | 0.420222 | 0.940502 | 0.824328 | 1 |
| Si | Si51 | 1 | 0.689273 | 0.279833 | 0.845233 | 1 |
| Si | Si52 | 1 | 0.870276 | 0.384921 | 0.340339 | 1 |
| Si | Si53 | 1 | 0.015543 | 0.390780 | 0.717370 | 1 |
| Si | Si54 | 1 | 0.936287 | 0.962230 | 0.938669 | 1 |
| Si | Si55 | 1 | 0.852082 | 0.929692 | 0.413977 | 1 |
| Si | Si56 | 1 | 0.545472 | 0.473096 | 0.797464 | 1 |
| Si | Si57 | 1 | 0.131095 | 0.435379 | 0.949047 | 1 |
| Si | Si58 | 1 | 0.572632 | 0.865267 | 0.558468 | 1 |
| Si | Si59 | 1 | 0.267226 | 0.253077 | 0.959070 | 1 |
| Si | Si60 | 1 | 0.644116 | 0.811324 | 0.797624 | 1 |
| Si | Si61 | 1 | 0.226666 | 0.740547 | 0.623172 | 1 |
| Si | Si62 | 1 | 0.440489 | 0.734809 | 0.225242 | 1 |
| Si | Si63 | 1 | 0.803041 | 0.879070 | 0.171679 | 1 |
| Si | Si64 | 1 | 0.576823 | 0.157028 | 0.502674 | 1 |
| Si | Si65 | 1 | 0.934070 | 0.707290 | 0.067114 | 1 |
| Si | Si66 | 1 | 0.392874 | 0.003563 | 0.303636 | 1 |
| Si | Si67 | 1 | 0.601403 | 0.449932 | 0.555967 | 1 |
| Si | Si68 | 1 | 0.830470 | 0.369021 | 0.071323 | 1 |
| Si | Si69 | 1 | 0.381649 | 0.432322 | 0.363911 | 1 |
| Si | Si70 | 1 | 0.355983 | 0.180243 | 0.196020 | 1 |
| Si | Si71 | 1 | 0.054260 | 0.269692 | 0.480203 | 1 |
| Si | Si72 | 1 | 0.246091 | 0.748086 | 0.023167 | 1 |

am-SiO<sub>2</sub> (generated by BOMD: 10ps at 5000 K, 25ps from 5000 to 2500 K, 20ps at 2500K, 25ps from 2500 to 1 K)

```
_symmetry_space_group_name_H-M 'P 1'  
_cell_length_a 10.50138479  
_cell_length_b 9.80590517  
_cell_length_c 11.59950077  
_cell_angle_alpha 88.13572272  
_cell_angle_beta 89.67427424  
_cell_angle_gamma 118.75564696  
_symmetry_Int_Tables_number 1  
_chemical_formula_structural SiO2  
_chemical_formula_sum 'Si24 O48'  
_cell_volume 1046.29853076  
_cell_formula_units_Z 24  
loop_  
_symmetry_equiv_pos_site_id  
_symmetry_equiv_pos_as_xyz  
1 'x, y, z'  
loop_  
_atom_site_type_symbol  
_atom_site_label  
_atom_site_symmetry_multiplicity  
_atom_site_fract_x  
_atom_site_fract_y  
_atom_site_fract_z  
_atom_site_occupancy  
O O1 1 0.253560 0.011711 0.140606 1  
O O2 1 0.500098 0.371445 0.099657 1  
O O3 1 0.126911 0.172756 0.661575 1  
O O4 1 0.459778 0.475493 0.298011 1  
O O5 1 0.925054 0.056309 0.831021 1  
O O6 1 0.836677 0.873198 0.313423 1  
O O7 1 0.736927 0.776216 0.922958 1  
O O8 1 0.092168 0.363957 0.800959 1  
O O9 1 0.654741 0.462536 0.912297 1  
O O10 1 0.280739 0.885363 0.336843 1  
O O11 1 0.661018 0.004799 0.879349 1  
O O12 1 0.936759 0.439240 0.243867 1  
O O13 1 0.463146 0.641296 0.581868 1  
O O14 1 0.105989 0.128844 0.031154 1  
O O15 1 0.902898 0.674620 0.825906 1  
O O16 1 0.604387 0.374564 0.438732 1  
O O17 1 0.715615 0.614351 0.190739 1  
O O18 1 0.953847 0.110890 0.451946 1  
O O19 1 0.871446 0.453812 0.479596 1  
O O20 1 0.142805 0.650919 0.831924 1  
O O21 1 0.519698 0.154126 0.973121 1  
O O22 1 0.449560 0.915928 0.579146 1  
O O23 1 0.968658 0.844155 0.129334 1  
O O24 1 0.618037 0.225030 0.625630 1  
O O25 1 0.437700 0.999589 0.788857 1  
O O26 1 0.407493 0.183846 0.311342 1  
O O27 1 0.879851 0.180050 0.643355 1  
O O28 1 0.985265 0.590004 0.027895 1  
O O29 1 0.328055 0.090006 0.621664 1  
O O30 1 0.248438 0.540163 0.991891 1  
O O31 1 0.640975 0.628546 0.736374 1  
O O32 1 0.322491 0.304813 0.482741 1  
O O33 1 0.823731 0.017352 0.051052 1  
O O34 1 0.945596 0.684377 0.325990 1
```



|    |      |   |          |          |          |   |
|----|------|---|----------|----------|----------|---|
| O  | O35  | 1 | 0.443247 | 0.764007 | 0.391717 | 1 |
| O  | O36  | 1 | 0.142006 | 0.591971 | 0.392761 | 1 |
| O  | O37  | 1 | 0.739401 | 0.339917 | 0.087852 | 1 |
| O  | O38  | 1 | 0.726617 | 0.167485 | 0.447892 | 1 |
| O  | O39  | 1 | 0.126606 | 0.881265 | 0.943473 | 1 |
| O  | O40  | 1 | 0.417808 | 0.846662 | 0.998610 | 1 |
| O  | O41  | 1 | 0.402187 | 0.372807 | 0.696946 | 1 |
| O  | O42  | 1 | 0.291212 | 0.683586 | 0.193871 | 1 |
| O  | O43  | 1 | 0.124048 | 0.028327 | 0.339677 | 1 |
| O  | O44  | 1 | 0.370339 | 0.595658 | 0.792871 | 1 |
| O  | O45  | 1 | 0.690147 | 0.906596 | 0.533396 | 1 |
| O  | O46  | 1 | 0.993590 | 0.163977 | 0.228608 | 1 |
| O  | O47  | 1 | 0.497633 | 0.645272 | 0.101337 | 1 |
| O  | O48  | 1 | 0.980807 | 0.321343 | 0.051512 | 1 |
| Si | Si49 | 1 | 0.508259 | 0.000595 | 0.913138 | 1 |
| Si | Si50 | 1 | 0.263831 | 0.026374 | 0.280404 | 1 |
| Si | Si51 | 1 | 0.703977 | 0.308356 | 0.500302 | 1 |
| Si | Si52 | 1 | 0.913349 | 0.425935 | 0.104812 | 1 |
| Si | Si53 | 1 | 0.291973 | 0.727914 | 0.328508 | 1 |
| Si | Si54 | 1 | 0.811944 | 0.091048 | 0.522304 | 1 |
| Si | Si55 | 1 | 0.977420 | 0.043633 | 0.333907 | 1 |
| Si | Si56 | 1 | 0.972307 | 0.538352 | 0.362042 | 1 |
| Si | Si57 | 1 | 0.038632 | 0.697741 | 0.907320 | 1 |
| Si | Si58 | 1 | 0.978746 | 0.159659 | 0.089858 | 1 |
| Si | Si59 | 1 | 0.115489 | 0.967608 | 0.058228 | 1 |
| Si | Si60 | 1 | 0.785089 | 0.960948 | 0.919015 | 1 |
| Si | Si61 | 1 | 0.734617 | 0.635168 | 0.849773 | 1 |
| Si | Si62 | 1 | 0.470521 | 0.560196 | 0.703376 | 1 |
| Si | Si63 | 1 | 0.209914 | 0.531768 | 0.853644 | 1 |
| Si | Si64 | 1 | 0.364574 | 0.680705 | 0.070350 | 1 |
| Si | Si65 | 1 | 0.292328 | 0.233849 | 0.615939 | 1 |
| Si | Si66 | 1 | 0.864260 | 0.750099 | 0.240151 | 1 |
| Si | Si67 | 1 | 0.446952 | 0.335485 | 0.385474 | 1 |
| Si | Si68 | 1 | 0.463348 | 0.059755 | 0.654563 | 1 |
| Si | Si69 | 1 | 0.541360 | 0.528109 | 0.171161 | 1 |
| Si | Si70 | 1 | 0.512776 | 0.810955 | 0.520024 | 1 |
| Si | Si71 | 1 | 0.007473 | 0.198113 | 0.734538 | 1 |
| Si | Si72 | 1 | 0.603051 | 0.330731 | 0.017170 | 1 |

am-SiO<sub>2</sub> (generated by BOMD: 10ps at 5000 K, 10ps from 5000 to 2500 K, 10ps at 2500K, 30ps from 2500 to 1 K)

```
_symmetry_space_group_name_H-M 'P 1'  
_cell_length_a 10.52451169  
_cell_length_b 10.30524491  
_cell_length_c 11.86869266  
_cell_angle_alpha 87.91591373  
_cell_angle_beta 94.00161934  
_cell_angle_gamma 124.51111958  
_symmetry_Int_Tables_number 1  
_chemical_formula_structural SiO2  
_chemical_formula_sum 'Si24 O48'  
_cell_volume 1058.12172326  
_cell_formula_units_Z 24  
loop_  
_symmetry_equiv_pos_site_id  
_symmetry_equiv_pos_as_xyz  
1 'x, y, z'  
loop_  
_atom_site_type_symbol  
_atom_site_label  
_atom_site_symmetry_multiplicity  
_atom_site_fract_x  
_atom_site_fract_y  
_atom_site_fract_z  
_atom_site_occupancy  
O O1 1 0.620361 0.461817 0.413578 1  
O O2 1 0.164719 0.151437 0.168118 1  
O O3 1 0.974750 0.385906 0.396162 1  
O O4 1 0.079597 0.195944 0.371156 1  
O O5 1 0.703255 0.925388 0.147526 1  
O O6 1 0.079721 0.628046 0.547818 1  
O O7 1 0.795570 0.393940 0.534850 1  
O O8 1 0.183450 0.486802 0.168982 1  
O O9 1 0.915482 0.208616 0.085846 1  
O O10 1 0.753047 0.756296 0.036148 1  
O O11 1 0.059763 0.481327 0.972728 1  
O O12 1 0.119131 0.371730 0.804722 1  
O O13 1 0.249413 0.875341 0.687256 1  
O O14 1 0.041821 0.086921 0.779245 1  
O O15 1 0.446802 0.729268 0.283041 1  
O O16 1 0.376052 0.911127 0.359886 1  
O O17 1 0.058161 0.588448 0.771034 1  
O O18 1 0.193213 0.930761 0.480617 1  
O O19 1 0.061384 0.937611 0.010724 1  
O O20 1 0.509505 0.162635 0.485855 1  
O O21 1 0.306572 0.625421 0.456866 1  
O O22 1 0.691810 0.472976 0.193911 1  
O O23 1 0.601160 0.093144 0.079165 1  
O O24 1 0.346818 0.417703 0.294001 1  
O O25 1 0.350233 0.335618 0.786354 1  
O O26 1 0.765437 0.885806 0.663975 1  
O O27 1 0.902042 0.433224 0.151456 1  
O O28 1 0.002919 0.876285 0.638950 1  
O O29 1 0.572640 0.374536 0.638660 1  
O O30 1 0.529952 0.110611 0.862094 1  
O O31 1 0.361246 0.119556 0.032966 1  
O O32 1 0.129396 0.359085 0.564333 1  
O O33 1 0.906745 0.604739 0.364722 1  
O O34 1 0.864804 0.784436 0.836333 1
```

|    |      |   |          |          |          |   |
|----|------|---|----------|----------|----------|---|
| O  | O35  | 1 | 0.716320 | 0.021999 | 0.920242 | 1 |
| O  | O36  | 1 | 0.652268 | 0.354821 | 0.996676 | 1 |
| O  | O37  | 1 | 0.486024 | 0.609216 | 0.122091 | 1 |
| O  | O38  | 1 | 0.654577 | 0.049141 | 0.690310 | 1 |
| O  | O39  | 1 | 0.574778 | 0.883665 | 0.494880 | 1 |
| O  | O40  | 1 | 0.315031 | 0.148736 | 0.335693 | 1 |
| O  | O41  | 1 | 0.276424 | 0.154921 | 0.618949 | 1 |
| O  | O42  | 1 | 0.900552 | 0.632679 | 0.017445 | 1 |
| O  | O43  | 1 | 0.202894 | 0.244217 | 0.966730 | 1 |
| O  | O44  | 1 | 0.830677 | 0.297800 | 0.818940 | 1 |
| O  | O45  | 1 | 0.305001 | 0.647388 | 0.673314 | 1 |
| O  | O46  | 1 | 0.416198 | 0.486525 | 0.593723 | 1 |
| O  | O47  | 1 | 0.855556 | 0.118352 | 0.516378 | 1 |
| O  | O48  | 1 | 0.737441 | 0.721493 | 0.270955 | 1 |
| Si | Si49 | 1 | 0.360211 | 0.559354 | 0.217092 | 1 |
| Si | Si50 | 1 | 0.734641 | 0.061458 | 0.057820 | 1 |
| Si | Si51 | 1 | 0.008478 | 0.260551 | 0.457204 | 1 |
| Si | Si52 | 1 | 0.526966 | 0.164814 | 0.991810 | 1 |
| Si | Si53 | 1 | 0.669892 | 0.750696 | 0.147705 | 1 |
| Si | Si54 | 1 | 0.916654 | 0.908571 | 0.731841 | 1 |
| Si | Si55 | 1 | 0.786269 | 0.474634 | 0.089721 | 1 |
| Si | Si56 | 1 | 0.349659 | 0.038239 | 0.412729 | 1 |
| Si | Si57 | 1 | 0.943247 | 0.505738 | 0.457862 | 1 |
| Si | Si58 | 1 | 0.018890 | 0.401202 | 0.096384 | 1 |
| Si | Si59 | 1 | 0.182406 | 0.963713 | 0.610583 | 1 |
| Si | Si60 | 1 | 0.292427 | 0.533057 | 0.573928 | 1 |
| Si | Si61 | 1 | 0.177454 | 0.258383 | 0.832185 | 1 |
| Si | Si62 | 1 | 0.430511 | 0.794804 | 0.400286 | 1 |
| Si | Si63 | 1 | 0.221461 | 0.226582 | 0.294863 | 1 |
| Si | Si64 | 1 | 0.621954 | 0.350070 | 0.517112 | 1 |
| Si | Si65 | 1 | 0.173472 | 0.686818 | 0.671173 | 1 |
| Si | Si66 | 1 | 0.712750 | 0.987651 | 0.591397 | 1 |
| Si | Si67 | 1 | 0.738992 | 0.567644 | 0.313782 | 1 |
| Si | Si68 | 1 | 0.403591 | 0.337540 | 0.660492 | 1 |
| Si | Si69 | 1 | 0.202845 | 0.113519 | 0.047633 | 1 |
| Si | Si70 | 1 | 0.013976 | 0.431324 | 0.841278 | 1 |
| Si | Si71 | 1 | 0.895879 | 0.780259 | 0.972714 | 1 |
| Si | Si72 | 1 | 0.680022 | 0.115556 | 0.819354 | 1 |

am-SiO<sub>2</sub> (generated by BOMD: 10ps at 5000 K, 25ps from 5000 to 2500 K, 20ps at 2500K, 25ps from 2500 to 1 K)

```
_symmetry_space_group_name_H-M 'P 1'  
_cell_length_a 10.03733129  
_cell_length_b 9.65466570  
_cell_length_c 12.67140678  
_cell_angle_alpha 91.20014218  
_cell_angle_beta 88.09093191  
_cell_angle_gamma 119.97620760  
_symmetry_Int_Tables_number 1  
_chemical_formula_structural SiO2  
_chemical_formula_sum 'Si24 O48'  
_cell_volume 1063.08639043  
_cell_formula_units_Z 24  
loop_  
_symmetry_equiv_pos_site_id  
_symmetry_equiv_pos_as_xyz  
1 'x, y, z'  
loop_  
_atom_site_type_symbol  
_atom_site_label  
_atom_site_symmetry_multiplicity  
_atom_site_fract_x  
_atom_site_fract_y  
_atom_site_fract_z  
_atom_site_occupancy  
O O1 1 0.633992 0.009508 0.457516 1  
O O2 1 0.400634 0.273731 0.275388 1  
O O3 1 0.492512 0.363554 0.972470 1  
O O4 1 0.796435 0.627565 0.601478 1  
O O5 1 0.695931 0.494875 0.300842 1  
O O6 1 0.246700 0.955642 0.279857 1  
O O7 1 0.423706 0.594857 0.932977 1  
O O8 1 0.818646 0.936259 0.738369 1  
O O9 1 0.034098 0.641325 0.492335 1  
O O10 1 0.161930 0.012590 0.026811 1  
O O11 1 0.994842 0.135059 0.110737 1  
O O12 1 0.957159 0.024704 0.913934 1  
O O13 1 0.059472 0.902805 0.565798 1  
O O14 1 0.580548 0.915788 0.256749 1  
O O15 1 0.855942 0.153724 0.297221 1  
O O16 1 0.724797 0.301942 0.960234 1  
O O17 1 0.154846 0.470679 0.564253 1  
O O18 1 0.611576 0.828839 0.062328 1  
O O19 1 0.741051 0.766994 0.223363 1  
O O20 1 0.810678 0.203810 0.795341 1  
O O21 1 0.328192 0.523401 0.393819 1  
O O22 1 0.402947 0.392426 0.783372 1  
O O23 1 0.721834 0.732012 0.900326 1  
O O24 1 0.975558 0.708363 0.224343 1  
O O25 1 0.437750 0.735610 0.550201 1  
O O26 1 0.091270 0.107002 0.298659 1  
O O27 1 0.276814 0.131248 0.451220 1  
O O28 1 0.866077 0.758382 0.406815 1  
O O29 1 0.606459 0.296548 0.136499 1  
O O30 1 0.219928 0.818894 0.890708 1  
O O31 1 0.563768 0.328459 0.624214 1  
O O32 1 0.990433 0.517177 0.872425 1  
O O33 1 0.440941 0.064048 0.995507 1  
O O34 1 0.206042 0.294545 0.955161 1
```

|    |      |   |          |          |          |   |
|----|------|---|----------|----------|----------|---|
| O  | O35  | 1 | 0.868213 | 0.399591 | 0.613167 | 1 |
| O  | O36  | 1 | 0.214743 | 0.674006 | 0.283267 | 1 |
| O  | O37  | 1 | 0.739789 | 0.443789 | 0.780850 | 1 |
| O  | O38  | 1 | 0.117354 | 0.665058 | 0.696572 | 1 |
| O  | O39  | 1 | 0.136487 | 0.384366 | 0.233039 | 1 |
| O  | O40  | 1 | 0.271453 | 0.146868 | 0.658097 | 1 |
| O  | O41  | 1 | 0.602760 | 0.996693 | 0.664876 | 1 |
| O  | O42  | 1 | 0.976770 | 0.787953 | 0.805258 | 1 |
| O  | O43  | 1 | 0.399569 | 0.450234 | 0.578827 | 1 |
| O  | O44  | 1 | 0.430746 | 0.611096 | 0.201216 | 1 |
| O  | O45  | 1 | 0.612472 | 0.194502 | 0.325684 | 1 |
| O  | O46  | 1 | 0.362438 | 0.958323 | 0.556420 | 1 |
| O  | O47  | 1 | 0.591231 | 0.905858 | 0.864558 | 1 |
| O  | O48  | 1 | 0.224547 | 0.800747 | 0.098343 | 1 |
| Si | Si49 | 1 | 0.075292 | 0.696246 | 0.818063 | 1 |
| Si | Si50 | 1 | 0.381258 | 0.410125 | 0.910261 | 1 |
| Si | Si51 | 1 | 0.332665 | 0.548189 | 0.520774 | 1 |
| Si | Si52 | 1 | 0.407849 | 0.332402 | 0.663717 | 1 |
| Si | Si53 | 1 | 0.162379 | 0.782916 | 0.220975 | 1 |
| Si | Si54 | 1 | 0.243785 | 0.028019 | 0.557729 | 1 |
| Si | Si55 | 1 | 0.874084 | 0.869120 | 0.836710 | 1 |
| Si | Si56 | 1 | 0.592366 | 0.779411 | 0.185950 | 1 |
| Si | Si57 | 1 | 0.252099 | 0.116255 | 0.325561 | 1 |
| Si | Si58 | 1 | 0.740654 | 0.450625 | 0.652459 | 1 |
| Si | Si59 | 1 | 0.261201 | 0.923488 | 0.000800 | 1 |
| Si | Si60 | 1 | 0.082050 | 0.119796 | 0.003433 | 1 |
| Si | Si61 | 1 | 0.583730 | 0.765872 | 0.940557 | 1 |
| Si | Si62 | 1 | 0.015980 | 0.194028 | 0.234443 | 1 |
| Si | Si63 | 1 | 0.046708 | 0.544743 | 0.593473 | 1 |
| Si | Si64 | 1 | 0.277703 | 0.548298 | 0.278095 | 1 |
| Si | Si65 | 1 | 0.818942 | 0.363129 | 0.850236 | 1 |
| Si | Si66 | 1 | 0.579253 | 0.315722 | 0.260059 | 1 |
| Si | Si67 | 1 | 0.674118 | 0.068908 | 0.334704 | 1 |
| Si | Si68 | 1 | 0.560318 | 0.254171 | 0.015075 | 1 |
| Si | Si69 | 1 | 0.509375 | 0.928251 | 0.555958 | 1 |
| Si | Si70 | 1 | 0.706181 | 0.012995 | 0.765274 | 1 |
| Si | Si71 | 1 | 0.935004 | 0.733698 | 0.514570 | 1 |
| Si | Si72 | 1 | 0.820425 | 0.683089 | 0.287340 | 1 |

am-SiO<sub>2</sub> (generated by BOMD: 10ps at 5000 K, 25ps from 5000 to 2500 K, 20ps at 2500K, 25ps from 2500 to 1 K)

```
_symmetry_space_group_name_H-M 'P 1'  
_cell_length_a 9.56605060  
_cell_length_b 10.24761185  
_cell_length_c 12.39811270  
_cell_angle_alpha 88.06065796  
_cell_angle_beta 87.12609672  
_cell_angle_gamma 118.06971622  
_symmetry_Int_Tables_number 1  
_chemical_formula_structural SiO2  
_chemical_formula_sum 'Si24 O48'  
_cell_volume 1068.79308207  
_cell_formula_units_Z 24  
loop_  
_symmetry_equiv_pos_site_id  
_symmetry_equiv_pos_as_xyz  
1 'x, y, z'  
loop_  
_atom_site_type_symbol  
_atom_site_label  
_atom_site_symmetry_multiplicity  
_atom_site_fract_x  
_atom_site_fract_y  
_atom_site_fract_z  
_atom_site_occupancy  
O O1 1 0.054614 0.463578 0.702797 1  
O O2 1 0.937768 0.474814 0.513958 1  
O O3 1 0.944125 0.177828 0.679066 1  
O O4 1 0.490524 0.414455 0.855183 1  
O O5 1 0.679119 0.228555 0.189980 1  
O O6 1 0.848946 0.517512 0.190600 1  
O O7 1 0.481374 0.212208 0.738736 1  
O O8 1 0.768247 0.485939 0.769751 1  
O O9 1 0.343440 0.977710 0.122936 1  
O O10 1 0.508436 0.658025 0.240166 1  
O O11 1 0.340884 0.926885 0.697735 1  
O O12 1 0.409569 0.795795 0.010558 1  
O O13 1 0.913178 0.184878 0.087847 1  
O O14 1 0.811949 0.711918 0.302844 1  
O O15 1 0.542378 0.403873 0.248515 1  
O O16 1 0.965655 0.273751 0.395053 1  
O O17 1 0.648428 0.734765 0.982901 1  
O O18 1 0.668560 0.957757 0.188746 1  
O O19 1 0.183491 0.950366 0.537264 1  
O O20 1 0.257462 0.016939 0.325404 1  
O O21 1 0.655600 0.848665 0.383842 1  
O O22 1 0.340642 0.536149 0.945977 1  
O O23 1 0.391177 0.841516 0.298664 1  
O O24 1 0.562404 0.439227 0.623616 1  
O O25 1 0.722783 0.340469 0.376789 1  
O O26 1 0.101230 0.759527 0.234638 1  
O O27 1 0.380848 0.005919 0.900224 1  
O O28 1 0.924300 0.987684 0.953649 1  
O O29 1 0.190564 0.244459 0.974584 1  
O O30 1 0.194374 0.196537 0.455094 1  
O O31 1 0.737464 0.724501 0.738173 1  
O O32 1 0.966520 0.951207 0.408532 1  
O O33 1 0.194513 0.444209 0.513902 1  
O O34 1 0.953143 0.253939 0.879500 1
```

|    |      |   |          |          |          |   |
|----|------|---|----------|----------|----------|---|
| O  | O35  | 1 | 0.641941 | 0.079836 | 0.760860 | 1 |
| O  | O36  | 1 | 0.900993 | 0.782183 | 0.098503 | 1 |
| O  | O37  | 1 | 0.625575 | 0.082814 | 0.014895 | 1 |
| O  | O38  | 1 | 0.506818 | 0.771709 | 0.809565 | 1 |
| O  | O39  | 1 | 0.701583 | 0.926012 | 0.626401 | 1 |
| O  | O40  | 1 | 0.488206 | 0.650603 | 0.618101 | 1 |
| O  | O41  | 1 | 0.264332 | 0.404985 | 0.304888 | 1 |
| O  | O42  | 1 | 0.209503 | 0.704051 | 0.566345 | 1 |
| O  | O43  | 1 | 0.495388 | 0.511132 | 0.430978 | 1 |
| O  | O44  | 1 | 0.901936 | 0.722550 | 0.898504 | 1 |
| O  | O45  | 1 | 0.754923 | 0.697483 | 0.511844 | 1 |
| O  | O46  | 1 | 0.226751 | 0.350269 | 0.773383 | 1 |
| O  | O47  | 1 | 0.025261 | 0.750718 | 0.702459 | 1 |
| O  | O48  | 1 | 0.730892 | 0.185309 | 0.551058 | 1 |
| Si | Si49 | 1 | 0.552394 | 0.824963 | 0.277490 | 1 |
| Si | Si50 | 1 | 0.436779 | 0.965251 | 0.012681 | 1 |
| Si | Si51 | 1 | 0.275229 | 0.900222 | 0.245584 | 1 |
| Si | Si52 | 1 | 0.458140 | 0.050919 | 0.775296 | 1 |
| Si | Si53 | 1 | 0.152712 | 0.327829 | 0.417157 | 1 |
| Si | Si54 | 1 | 0.838104 | 0.317328 | 0.457878 | 1 |
| Si | Si55 | 1 | 0.606597 | 0.770019 | 0.699138 | 1 |
| Si | Si56 | 1 | 0.994792 | 0.164005 | 0.975045 | 1 |
| Si | Si57 | 1 | 0.723986 | 0.117619 | 0.123494 | 1 |
| Si | Si58 | 1 | 0.480362 | 0.708612 | 0.937078 | 1 |
| Si | Si59 | 1 | 0.578354 | 0.389230 | 0.746512 | 1 |
| Si | Si60 | 1 | 0.102287 | 0.524733 | 0.574901 | 1 |
| Si | Si61 | 1 | 0.696403 | 0.372730 | 0.251313 | 1 |
| Si | Si62 | 1 | 0.570294 | 0.570493 | 0.544368 | 1 |
| Si | Si63 | 1 | 0.311069 | 0.384337 | 0.889244 | 1 |
| Si | Si64 | 1 | 0.042717 | 0.311577 | 0.758120 | 1 |
| Si | Si65 | 1 | 0.918472 | 0.694716 | 0.203945 | 1 |
| Si | Si66 | 1 | 0.860216 | 0.667932 | 0.776730 | 1 |
| Si | Si67 | 1 | 0.458656 | 0.496491 | 0.303212 | 1 |
| Si | Si68 | 1 | 0.842022 | 0.808023 | 0.983082 | 1 |
| Si | Si69 | 1 | 0.798564 | 0.805764 | 0.402304 | 1 |
| Si | Si70 | 1 | 0.189975 | 0.834854 | 0.626819 | 1 |
| Si | Si71 | 1 | 0.756144 | 0.095834 | 0.653469 | 1 |
| Si | Si72 | 1 | 0.153424 | 0.027691 | 0.431258 | 1 |

## SiO<sub>2</sub> polymorphs

SiO<sub>2</sub> (mp-10948)

\_symmetry\_space\_group\_name\_H-M 'P 1'

\_cell\_length\_a 8.22824478

\_cell\_length\_b 9.05432510

\_cell\_length\_c 10.16249561

\_cell\_angle\_alpha 90.00000000

\_cell\_angle\_beta 90.00000000

\_cell\_angle\_gamma 90.00000000

\_symmetry\_Int\_Tables\_number 1

\_chemical\_formula\_structural SiO2

\_chemical\_formula\_sum 'Si32 O64'

\_cell\_volume 757.118151558

\_cell\_formula\_units\_Z 32

loop\_

\_symmetry\_equiv\_pos\_site\_id

\_symmetry\_equiv\_pos\_as\_xyz

1 'x, y, z'

loop\_

\_atom\_site\_type\_symbol

\_atom\_site\_label

\_atom\_site\_symmetry\_multiplicity

\_atom\_site\_fract\_x

\_atom\_site\_fract\_y

\_atom\_site\_fract\_z

\_atom\_site\_occupancy

|    |      |   |          |          |          |   |
|----|------|---|----------|----------|----------|---|
| Si | Si1  | 1 | 0.250000 | 0.375000 | 0.173845 | 1 |
| Si | Si2  | 1 | 0.250000 | 0.375000 | 0.673845 | 1 |
| Si | Si3  | 1 | 0.250000 | 0.875000 | 0.173845 | 1 |
| Si | Si4  | 1 | 0.250000 | 0.875000 | 0.673845 | 1 |
| Si | Si5  | 1 | 0.750000 | 0.375000 | 0.173845 | 1 |
| Si | Si6  | 1 | 0.750000 | 0.375000 | 0.673845 | 1 |
| Si | Si7  | 1 | 0.750000 | 0.875000 | 0.173845 | 1 |
| Si | Si8  | 1 | 0.750000 | 0.875000 | 0.673845 | 1 |
| Si | Si9  | 1 | 0.000000 | 0.125000 | 0.076155 | 1 |
| Si | Si10 | 1 | 0.000000 | 0.125000 | 0.576155 | 1 |
| Si | Si11 | 1 | 0.000000 | 0.625000 | 0.076155 | 1 |
| Si | Si12 | 1 | 0.000000 | 0.625000 | 0.576155 | 1 |
| Si | Si13 | 1 | 0.500000 | 0.125000 | 0.076155 | 1 |
| Si | Si14 | 1 | 0.500000 | 0.125000 | 0.576155 | 1 |
| Si | Si15 | 1 | 0.500000 | 0.625000 | 0.076155 | 1 |
| Si | Si16 | 1 | 0.500000 | 0.625000 | 0.576155 | 1 |
| Si | Si17 | 1 | 0.250000 | 0.125000 | 0.326156 | 1 |
| Si | Si18 | 1 | 0.250000 | 0.125000 | 0.826156 | 1 |
| Si | Si19 | 1 | 0.250000 | 0.625000 | 0.326156 | 1 |
| Si | Si20 | 1 | 0.250000 | 0.625000 | 0.826156 | 1 |
| Si | Si21 | 1 | 0.750000 | 0.125000 | 0.326156 | 1 |
| Si | Si22 | 1 | 0.750000 | 0.125000 | 0.826156 | 1 |
| Si | Si23 | 1 | 0.750000 | 0.625000 | 0.326156 | 1 |
| Si | Si24 | 1 | 0.750000 | 0.625000 | 0.826156 | 1 |
| Si | Si25 | 1 | 0.000000 | 0.375000 | 0.423844 | 1 |
| Si | Si26 | 1 | 0.000000 | 0.375000 | 0.923844 | 1 |
| Si | Si27 | 1 | 0.000000 | 0.875000 | 0.423844 | 1 |
| Si | Si28 | 1 | 0.000000 | 0.875000 | 0.923844 | 1 |
| Si | Si29 | 1 | 0.500000 | 0.375000 | 0.423844 | 1 |
| Si | Si30 | 1 | 0.500000 | 0.375000 | 0.923844 | 1 |
| Si | Si31 | 1 | 0.500000 | 0.875000 | 0.423844 | 1 |
| Si | Si32 | 1 | 0.500000 | 0.875000 | 0.923844 | 1 |
| O  | O33  | 1 | 0.134550 | 0.289984 | 0.308789 | 1 |
| O  | O34  | 1 | 0.134550 | 0.289984 | 0.808789 | 1 |



O O35 1 0.134550 0.789984 0.308789 1  
O O36 1 0.134550 0.789984 0.808789 1  
O O37 1 0.634551 0.289984 0.308789 1  
O O38 1 0.634551 0.289984 0.808789 1  
O O39 1 0.634551 0.789984 0.308789 1  
O O40 1 0.634551 0.789984 0.808789 1  
O O41 1 0.384551 0.210016 0.441211 1  
O O42 1 0.384551 0.210016 0.941211 1  
O O43 1 0.384551 0.710016 0.441211 1  
O O44 1 0.384551 0.710016 0.941211 1  
O O45 1 0.884551 0.210016 0.441211 1  
O O46 1 0.884551 0.210016 0.941211 1  
O O47 1 0.884551 0.710016 0.441211 1  
O O48 1 0.884551 0.710016 0.941211 1  
O O49 1 0.115450 0.039984 0.441211 1  
O O50 1 0.115450 0.039984 0.941211 1  
O O51 1 0.115450 0.539985 0.441211 1  
O O52 1 0.115450 0.539985 0.941211 1  
O O53 1 0.615449 0.039984 0.441211 1  
O O54 1 0.615449 0.039984 0.941211 1  
O O55 1 0.615449 0.539985 0.441211 1  
O O56 1 0.615449 0.539985 0.941211 1  
O O57 1 0.365449 0.460016 0.308789 1  
O O58 1 0.365449 0.460016 0.808789 1  
O O59 1 0.365449 0.960016 0.308789 1  
O O60 1 0.365449 0.960016 0.808789 1  
O O61 1 0.865449 0.460016 0.308789 1  
O O62 1 0.865449 0.460016 0.808789 1  
O O63 1 0.865449 0.960016 0.308789 1  
O O64 1 0.865449 0.960016 0.808789 1  
O O65 1 0.134550 0.039984 0.191211 1  
O O66 1 0.134550 0.039984 0.691211 1  
O O67 1 0.134550 0.539985 0.191211 1  
O O68 1 0.134550 0.539985 0.691211 1  
O O69 1 0.634551 0.039984 0.191211 1  
O O70 1 0.634551 0.039984 0.691211 1  
O O71 1 0.634551 0.539985 0.191211 1  
O O72 1 0.634551 0.539985 0.691211 1  
O O73 1 0.384551 0.460016 0.058789 1  
O O74 1 0.384551 0.460016 0.558789 1  
O O75 1 0.384551 0.960016 0.058789 1  
O O76 1 0.384551 0.960016 0.558789 1  
O O77 1 0.884551 0.460016 0.058789 1  
O O78 1 0.884551 0.460016 0.558789 1  
O O79 1 0.884551 0.960016 0.058789 1  
O O80 1 0.884551 0.960016 0.558789 1  
O O81 1 0.115450 0.289984 0.058789 1  
O O82 1 0.115450 0.289984 0.558789 1  
O O83 1 0.115450 0.789984 0.058789 1  
O O84 1 0.115450 0.789984 0.558789 1  
O O85 1 0.615449 0.289984 0.058789 1  
O O86 1 0.615449 0.289984 0.558789 1  
O O87 1 0.615449 0.789984 0.058789 1  
O O88 1 0.615449 0.789984 0.558789 1  
O O89 1 0.365449 0.210016 0.191211 1  
O O90 1 0.365449 0.210016 0.691211 1  
O O91 1 0.365449 0.710016 0.191211 1  
O O92 1 0.365449 0.710016 0.691211 1  
O O93 1 0.865449 0.210016 0.191211 1  
O O94 1 0.865449 0.210016 0.691211 1

O O95 1 0.865449 0.710016 0.191211 1  
O O96 1 0.865449 0.710016 0.691211 1

SiO<sub>2</sub> (mp-11684)

```

_symmetry_space_group_name_H-M 'P 1'
_cell_length_a 7.25932503
_cell_length_b 12.53347778
_cell_length_c 7.24237204
_cell_angle_alpha 90.00000000
_cell_angle_beta 119.96224213
_cell_angle_gamma 90.00000000
_symmetry_Int_Tables_number 1
_chemical_formula_structural SiO2
_chemical_formula_sum 'Si16 O32'
_cell_volume 570.879451833
_cell_formula_units_Z 16
loop_
_symmetry_equiv_pos_site_id
_symmetry_equiv_pos_as_xyz
1 'x, y, z'
loop_
_atom_site_type_symbol
_atom_site_label
_atom_site_symmetry_multiplicity
_atom_site_fract_x
_atom_site_fract_y
_atom_site_fract_z
_atom_site_occupancy
Si Si1 1 0.282978 0.591310 0.038998 1
Si Si2 1 0.217022 0.091310 0.461002 1
Si Si3 1 0.217022 0.908690 0.961002 1
Si Si4 1 0.282978 0.408690 0.538998 1
Si Si5 1 0.181128 0.642363 0.573122 1
Si Si6 1 0.318872 0.142363 0.926878 1
Si Si7 1 0.318872 0.857637 0.426878 1
Si Si8 1 0.181128 0.357637 0.073122 1
Si Si9 1 0.782978 0.091310 0.038998 1
Si Si10 1 0.717022 0.591310 0.461002 1
Si Si11 1 0.717022 0.408690 0.961002 1
Si Si12 1 0.782978 0.908690 0.538998 1
Si Si13 1 0.681128 0.142363 0.573122 1
Si Si14 1 0.818872 0.642363 0.926878 1
Si Si15 1 0.818872 0.357637 0.426878 1
Si Si16 1 0.681128 0.857637 0.073122 1
O O17 1 0.217860 0.038639 0.982206 1
O O18 1 0.282140 0.538639 0.517794 1
O O19 1 0.282140 0.461361 0.017794 1
O O20 1 0.217860 0.961361 0.482206 1
O O21 1 0.270974 0.645085 0.829069 1
O O22 1 0.229026 0.145085 0.670931 1
O O23 1 0.229026 0.854915 0.170931 1
O O24 1 0.270974 0.354915 0.329069 1
O O25 1 0.250000 0.250000 0.000000 1
O O26 1 0.250000 0.750000 0.500000 1
O O27 1 0.500000 0.369420 0.750000 1
O O28 1 0.000000 0.130580 0.250000 1
O O29 1 0.923016 0.370257 0.944517 1
O O30 1 0.076984 0.370257 0.555483 1
O O31 1 0.576984 0.129743 0.055483 1
O O32 1 0.423016 0.129743 0.444517 1
O O33 1 0.717860 0.538639 0.982206 1
O O34 1 0.782140 0.038639 0.517794 1
O O35 1 0.782140 0.961361 0.017794 1

```

O O36 1 0.717860 0.461361 0.482206 1  
O O37 1 0.770974 0.145085 0.829069 1  
O O38 1 0.729026 0.645085 0.670931 1  
O O39 1 0.729026 0.354915 0.170931 1  
O O40 1 0.770974 0.854915 0.329069 1  
O O41 1 0.750000 0.750000 0.000000 1  
O O42 1 0.750000 0.250000 0.500000 1  
O O43 1 0.000000 0.869420 0.750000 1  
O O44 1 0.500000 0.630580 0.250000 1  
O O45 1 0.423016 0.870257 0.944517 1  
O O46 1 0.576984 0.870257 0.555483 1  
O O47 1 0.076984 0.629743 0.055483 1  
O O48 1 0.923016 0.629743 0.444517 1

SiO<sub>2</sub> (mp-560527)

\_symmetry\_space\_group\_name\_H-M 'P 1'

\_cell\_length\_a 9.64713669

\_cell\_length\_b 10.42974091

\_cell\_length\_c 9.05719280

\_cell\_angle\_alpha 90.00000000

\_cell\_angle\_beta 90.00000000

\_cell\_angle\_gamma 90.00000000

\_symmetry\_Int\_Tables\_number 1

\_chemical\_formula\_structural SiO2

\_chemical\_formula\_sum 'Si16 O32'

\_cell\_volume 911.308801252

\_cell\_formula\_units\_Z 16

loop\_

\_symmetry\_equiv\_pos\_site\_id

\_symmetry\_equiv\_pos\_as\_xyz

1 'x, y, z'

loop\_

\_atom\_site\_type\_symbol

\_atom\_site\_label

\_atom\_site\_symmetry\_multiplicity

\_atom\_site\_fract\_x

\_atom\_site\_fract\_y

\_atom\_site\_fract\_z

\_atom\_site\_occupancy

|    |      |   |          |          |          |   |
|----|------|---|----------|----------|----------|---|
| Si | Si1  | 1 | 0.835537 | 0.865501 | 0.425059 | 1 |
| Si | Si2  | 1 | 0.835537 | 0.134499 | 0.925059 | 1 |
| Si | Si3  | 1 | 0.164463 | 0.134499 | 0.925059 | 1 |
| Si | Si4  | 1 | 0.835537 | 0.865501 | 0.074941 | 1 |
| Si | Si5  | 1 | 0.164463 | 0.134499 | 0.574941 | 1 |
| Si | Si6  | 1 | 0.164463 | 0.865501 | 0.425059 | 1 |
| Si | Si7  | 1 | 0.835537 | 0.134499 | 0.574941 | 1 |
| Si | Si8  | 1 | 0.164463 | 0.865501 | 0.074941 | 1 |
| Si | Si9  | 1 | 0.335537 | 0.365501 | 0.425059 | 1 |
| Si | Si10 | 1 | 0.335537 | 0.634499 | 0.925059 | 1 |
| Si | Si11 | 1 | 0.664463 | 0.634499 | 0.925059 | 1 |
| Si | Si12 | 1 | 0.335537 | 0.365501 | 0.074941 | 1 |
| Si | Si13 | 1 | 0.664463 | 0.634499 | 0.574941 | 1 |
| Si | Si14 | 1 | 0.664463 | 0.365501 | 0.425059 | 1 |
| Si | Si15 | 1 | 0.335537 | 0.634499 | 0.574941 | 1 |
| Si | Si16 | 1 | 0.664463 | 0.365501 | 0.074941 | 1 |
| O  | O17  | 1 | 0.212038 | 0.000000 | 0.000000 | 1 |
| O  | O18  | 1 | 0.000000 | 0.158808 | 0.547537 | 1 |
| O  | O19  | 1 | 0.000000 | 0.841192 | 0.047537 | 1 |
| O  | O20  | 1 | 0.787962 | 0.000000 | 0.500000 | 1 |
| O  | O21  | 1 | 0.198917 | 0.129191 | 0.750000 | 1 |
| O  | O22  | 1 | 0.801083 | 0.129191 | 0.750000 | 1 |
| O  | O23  | 1 | 0.750000 | 0.250000 | 0.500000 | 1 |
| O  | O24  | 1 | 0.212038 | 0.000000 | 0.500000 | 1 |
| O  | O25  | 1 | 0.000000 | 0.158808 | 0.952463 | 1 |
| O  | O26  | 1 | 0.787962 | 0.000000 | 0.000000 | 1 |
| O  | O27  | 1 | 0.000000 | 0.841192 | 0.452463 | 1 |
| O  | O28  | 1 | 0.198917 | 0.870809 | 0.250000 | 1 |
| O  | O29  | 1 | 0.801083 | 0.870809 | 0.250000 | 1 |
| O  | O30  | 1 | 0.750000 | 0.750000 | 0.000000 | 1 |
| O  | O31  | 1 | 0.750000 | 0.750000 | 0.500000 | 1 |
| O  | O32  | 1 | 0.750000 | 0.250000 | 0.000000 | 1 |
| O  | O33  | 1 | 0.712038 | 0.500000 | 0.000000 | 1 |
| O  | O34  | 1 | 0.500000 | 0.658808 | 0.547537 | 1 |
| O  | O35  | 1 | 0.500000 | 0.341192 | 0.047537 | 1 |

O O36 1 0.287962 0.500000 0.500000 1  
O O37 1 0.698917 0.629191 0.750000 1  
O O38 1 0.301083 0.629191 0.750000 1  
O O39 1 0.250000 0.750000 0.500000 1  
O O40 1 0.712038 0.500000 0.500000 1  
O O41 1 0.500000 0.658808 0.952463 1  
O O42 1 0.287962 0.500000 0.000000 1  
O O43 1 0.500000 0.341192 0.452463 1  
O O44 1 0.698917 0.370809 0.250000 1  
O O45 1 0.301083 0.370809 0.250000 1  
O O46 1 0.250000 0.250000 0.000000 1  
O O47 1 0.250000 0.250000 0.500000 1  
O O48 1 0.250000 0.750000 0.000000 1

SiO<sub>2</sub> (mp-604717)

```

_symmetry_space_group_name_H-M 'P 1'
_cell_length_a 9.19915104
_cell_length_b 9.19915104
_cell_length_c 9.75925922
_cell_angle_alpha 90.00000000
_cell_angle_beta 90.00000000
_cell_angle_gamma 90.00000000
_symmetry_Int_Tables_number 1
_chemical_formula_structural SiO2
_chemical_formula_sum 'Si12 O24'
_cell_volume 825.871259522
_cell_formula_units_Z 12
loop_
_symmetry_equiv_pos_site_id
_symmetry_equiv_pos_as_xyz
1 'x, y, z'
loop_
_atom_site_type_symbol
_atom_site_label
_atom_site_symmetry_multiplicity
_atom_site_fract_x
_atom_site_fract_y
_atom_site_fract_z
_atom_site_occupancy
Si Si1 1 0.323362 0.323362 0.000000 1
Si Si2 1 0.024799 0.369934 0.891693 1
Si Si3 1 0.823362 0.176638 0.750000 1
Si Si4 1 0.176638 0.823362 0.250000 1
Si Si5 1 0.975201 0.630066 0.391693 1
Si Si6 1 0.869934 0.475201 0.641693 1
Si Si7 1 0.676638 0.676638 0.500000 1
Si Si8 1 0.630066 0.975201 0.608307 1
Si Si9 1 0.369934 0.024799 0.108307 1
Si Si10 1 0.524799 0.130066 0.858307 1
Si Si11 1 0.475201 0.869934 0.358307 1
Si Si12 1 0.130066 0.524799 0.141693 1
O O13 1 0.944916 0.491518 0.793930 1
O O14 1 0.301709 0.835765 0.369442 1
O O15 1 0.461579 0.292344 0.897780 1
O O16 1 0.698291 0.164235 0.869442 1
O O17 1 0.198291 0.335765 0.880558 1
O O18 1 0.707656 0.538421 0.602220 1
O O19 1 0.207656 0.961579 0.147780 1
O O20 1 0.164235 0.698291 0.130558 1
O O21 1 0.444916 0.008482 0.956070 1
O O22 1 0.801709 0.664235 0.380558 1
O O23 1 0.055084 0.508482 0.293930 1
O O24 1 0.008482 0.444916 0.043930 1
O O25 1 0.038421 0.792344 0.352220 1
O O26 1 0.555084 0.991518 0.456070 1
O O27 1 0.538421 0.707656 0.397780 1
O O28 1 0.292344 0.461579 0.102220 1
O O29 1 0.792344 0.038421 0.647780 1
O O30 1 0.491518 0.944916 0.206070 1
O O31 1 0.335765 0.198291 0.119442 1
O O32 1 0.508482 0.055084 0.706070 1
O O33 1 0.835765 0.301709 0.630558 1
O O34 1 0.961579 0.207656 0.852220 1
O O35 1 0.664235 0.801709 0.619442 1

```

O O36 1 0.991518 0.555084 0.543930 1



SiO<sub>2</sub> (mp-555960)

\_symmetry\_space\_group\_name\_H-M 'P 1'

\_cell\_length\_a 10.10498047

\_cell\_length\_b 12.95531082

\_cell\_length\_c 13.10221195

\_cell\_angle\_alpha 93.70148468

\_cell\_angle\_beta 95.66514587

\_cell\_angle\_gamma 91.60611725

\_symmetry\_Int\_Tables\_number 1

\_chemical\_formula\_structural SiO2

\_chemical\_formula\_sum 'Si16 O32'

\_cell\_volume 1702.29137627

\_cell\_formula\_units\_Z 16

loop\_

\_symmetry\_equiv\_pos\_site\_id

\_symmetry\_equiv\_pos\_as\_xyz

1 'x, y, z'

loop\_

\_atom\_site\_type\_symbol

\_atom\_site\_label

\_atom\_site\_symmetry\_multiplicity

\_atom\_site\_fract\_x

\_atom\_site\_fract\_y

\_atom\_site\_fract\_z

\_atom\_site\_occupancy

Si Si1 1 0.234325 0.898977 0.430354 1

Si Si2 1 0.436052 0.602298 0.698901 1

Si Si3 1 0.395725 0.739013 0.359927 1

Si Si4 1 0.563948 0.397702 0.301099 1

Si Si5 1 0.328245 0.250920 0.566817 1

Si Si6 1 0.672100 0.249728 0.433228 1

Si Si7 1 0.563804 0.579035 0.301089 1

Si Si8 1 0.671755 0.749080 0.433183 1

Si Si9 1 0.603957 0.761976 0.639999 1

Si Si10 1 0.604275 0.260987 0.640073 1

Si Si11 1 0.436196 0.420965 0.698911 1

Si Si12 1 0.234496 0.080255 0.430477 1

Si Si13 1 0.396043 0.238025 0.360001 1

Si Si14 1 0.765675 0.101023 0.569646 1

Si Si15 1 0.765504 0.919745 0.569523 1

Si Si16 1 0.327900 0.750272 0.566772 1

O O17 1 0.276221 0.820294 0.334717 1

O O18 1 0.535412 0.493280 0.386240 1

O O19 1 0.211037 0.830123 0.529978 1

O O20 1 0.788963 0.169877 0.470021 1

O O21 1 0.535914 0.806785 0.390787 1

O O22 1 0.723779 0.179706 0.665283 1

O O23 1 0.464086 0.193215 0.609213 1

O O24 1 0.536297 0.180480 0.390873 1

O O25 1 0.692511 0.658074 0.342947 1

O O26 1 0.692743 0.329826 0.342935 1

O O27 1 0.723440 0.851771 0.665168 1

O O28 1 0.463703 0.819520 0.609127 1

O O29 1 0.276560 0.148229 0.334832 1

O O30 1 0.211419 0.161188 0.530040 1

O O31 1 0.407668 0.516701 0.786192 1

O O32 1 0.354621 0.307219 0.461155 1

O O33 1 0.431853 0.318345 0.273308 1

O O34 1 0.464588 0.506720 0.613760 1

O O35 1 0.645379 0.692781 0.538845 1

O O36 1 0.592332 0.483299 0.213808 1  
O O37 1 0.881769 0.014927 0.601178 1  
O O38 1 0.307489 0.341926 0.657053 1  
O O39 1 0.118231 0.985073 0.398822 1  
O O40 1 0.568147 0.681655 0.726692 1  
O O41 1 0.652079 0.005944 0.538207 1  
O O42 1 0.788581 0.838812 0.469960 1  
O O43 1 0.307257 0.670174 0.657065 1  
O O44 1 0.568362 0.351087 0.726689 1  
O O45 1 0.645762 0.318706 0.538873 1  
O O46 1 0.431638 0.648913 0.273311 1  
O O47 1 0.347921 0.994056 0.461793 1  
O O48 1 0.354238 0.681294 0.461127 1

SiO<sub>2</sub> (mp-559273)

```
_symmetry_space_group_name_H-M 'P 1'  
_cell_length_a 17.37358665  
_cell_length_b 17.37358665  
_cell_length_c 13.02581024  
_cell_angle_alpha 90.00000000  
_cell_angle_beta 90.00000000  
_cell_angle_gamma 120.00000000  
_symmetry_Int_Tables_number 1  
_chemical_formula_structural SiO2  
_chemical_formula_sum 'Si24 O48'  
_cell_volume 3404.97829866  
_cell_formula_units_Z 24  
loop_  
_symmetry_equiv_pos_site_id  
_symmetry_equiv_pos_as_xyz  
1 'x, y, z'  
loop_  
_atom_site_type_symbol  
_atom_site_label  
_atom_site_symmetry_multiplicity  
_atom_site_fract_x  
_atom_site_fract_y  
_atom_site_fract_z  
_atom_site_occupancy  
Si Si1 1 0.874172 0.437085 0.166667 1  
Si Si2 1 0.836477 0.276170 0.283869 1  
Si Si3 1 0.125828 0.562915 0.166667 1  
Si Si4 1 0.836477 0.560307 0.049465 1  
Si Si5 1 0.620205 0.000000 0.500000 1  
Si Si6 1 0.276170 0.439693 0.950535 1  
Si Si7 1 0.562915 0.125828 0.500000 1  
Si Si8 1 0.439693 0.163523 0.617202 1  
Si Si9 1 0.276170 0.836477 0.382798 1  
Si Si10 1 0.379795 0.379795 0.833333 1  
Si Si11 1 0.163523 0.439693 0.049465 1  
Si Si12 1 0.379795 -0.000000 0.500000 1  
Si Si13 1 0.620205 0.620205 0.833333 1  
Si Si14 1 0.000000 0.620205 0.166667 1  
Si Si15 1 0.437085 0.562915 0.833333 1  
Si Si16 1 0.560307 0.836477 0.617202 1  
Si Si17 1 0.437085 0.874172 0.500000 1  
Si Si18 1 0.723830 0.560307 0.950535 1  
Si Si19 1 -0.000000 0.379795 0.166667 1  
Si Si20 1 0.439693 0.276170 0.716131 1  
Si Si21 1 0.163523 0.723830 0.283869 1  
Si Si22 1 0.560307 0.723830 0.716131 1  
Si Si23 1 0.723830 0.163523 0.382798 1  
Si Si24 1 0.562915 0.437085 0.833333 1  
O O25 1 0.253721 0.431699 0.076233 1  
O O26 1 0.934457 0.529672 0.232697 1  
O O27 1 0.295892 0.362206 0.907099 1  
O O28 1 0.538252 0.181427 0.581723 1  
O O29 1 0.362206 0.295892 0.759568 1  
O O30 1 0.461748 0.818573 0.581723 1  
O O31 1 0.704108 0.637794 0.907099 1  
O O32 1 0.568301 0.746279 0.590433 1  
O O33 1 0.404784 0.934457 0.566030 1  
O O34 1 0.568301 0.822022 0.742900 1  
O O35 1 0.404784 0.470328 0.767303 1
```

O O36 1 0.595216 0.065543 0.566030 1  
O O37 1 0.746279 0.568301 0.076233 1  
O O38 1 0.643175 0.461748 0.915056 1  
O O39 1 0.595216 0.529672 0.767303 1  
O O40 1 0.470328 0.065543 0.433970 1  
O O41 1 0.529672 0.595216 0.899363 1  
O O42 1 0.065543 0.470328 0.232697 1  
O O43 1 0.822022 0.568301 0.923767 1  
O O44 1 0.356825 0.538252 0.915056 1  
O O45 1 0.362206 0.066313 0.573766 1  
O O46 1 0.066313 0.704108 0.240432 1  
O O47 1 0.643175 0.181427 0.418277 1  
O O48 1 0.746279 0.177978 0.257100 1  
O O49 1 0.822022 0.253721 0.409567 1  
O O50 1 0.637794 0.704108 0.759568 1  
O O51 1 0.253721 0.822022 0.257100 1  
O O52 1 0.818573 0.356825 0.248390 1  
O O53 1 0.704108 0.066313 0.426234 1  
O O54 1 0.431699 0.177978 0.742900 1  
O O55 1 0.065543 0.595216 0.100637 1  
O O56 1 0.431699 0.253721 0.590433 1  
O O57 1 0.181427 0.643175 0.248390 1  
O O58 1 0.637794 0.933687 0.573766 1  
O O59 1 0.529672 0.934457 0.433970 1  
O O60 1 0.356825 0.818573 0.418277 1  
O O61 1 0.934457 0.404784 0.100637 1  
O O62 1 0.066313 0.362206 0.092901 1  
O O63 1 0.933687 0.295892 0.240432 1  
O O64 1 0.295892 0.933687 0.426234 1  
O O65 1 0.538252 0.356825 0.751610 1  
O O66 1 0.177978 0.746279 0.409567 1  
O O67 1 0.470328 0.404784 0.899363 1  
O O68 1 0.181427 0.538252 0.084944 1  
O O69 1 0.461748 0.643175 0.751610 1  
O O70 1 0.177978 0.431699 0.923767 1  
O O71 1 0.818573 0.461748 0.084944 1  
O O72 1 0.933687 0.637794 0.092901 1

## References

1. A. Jain, S. P. Ong, G. Hautier, W. Chen, W. D. Richards, S. Dacek, S. Cholia, D. Gunter, D. Skinner, G. Ceder and K. A. Persson, *APL Mat.*, 2013, 1, 011002.
2. K. Momma and F. Izumi, *J. Appl. Crystallogr.*, 2011, 44, 1272-1276.
